# Supplementary material
Source: Elsevier journal article supplement (https://www.sciencedirect.com/science/article/pii/S0021755721001170)
Supplement: mmc1 [file S0021755721001170:mmc1.docx]

**JPED-D-21-00195 - Supplementary Material**

**Supplemental Digital Content**

**tracheostomy:** "tracheostomy"[MeSH Terms] OR "tracheostomy"[All Fields] OR "tracheostomies"[All Fields]

**children:** "child"[MeSH Terms] OR "child"[All Fields] OR "children"[All Fields] OR "child's"[All Fields] OR "children's"[All Fields] OR "childrens"[All Fields] OR "childs"[All Fields]

**tracheostomy:** "tracheostomy"[MeSH Terms] OR "tracheostomy"[All Fields] OR "tracheostomies"[All Fields]

**indications:** "indication"[All Fields] OR "indications"[All Fields]

**tracheostomy:** "tracheostomy"[MeSH Terms] OR "tracheostomy"[All Fields] OR "tracheostomies"[All Fields]

**complications:** "complicances"[All Fields] OR "complicate"[All Fields] OR "complicated"[All Fields] OR "complicates"[All Fields] OR "complicating"[All Fields] OR "complication"[All Fields] OR "complication's"[All Fields] OR "complications"[Subheading] OR "complications"[All Fields]

**decannulation:** "decannulate"[All Fields] OR "decannulated"[All Fields] OR "decannulating"[All Fields] OR "decannulation"[All Fields] OR "decannulations"[All Fields]
